# Supplementary material
Source: publisher figshare collection journal article supplement (https://karger.figshare.com/articles/dataset/_/12039864)
Supplement: Supplementary file 1 [file 1 › 505848_sm1.docx]

**Tables for Online**

Table 1S.

Participant demographics by condition (Online only).

|  | Total | Immersive Autographer | Autographer desktop | Digital camera photographs | *F*(2,42) |
| --- | --- | --- | --- | --- | --- |
| *N* | 46 | 16 | 15 | 15 | - |
| Gender* | 26 (56.5%) | 7 (43.8%) | 9 (60.0%) | 10 (66.7%) | - |
| Age | 78.85 (8.34) | 76.75 (7.95) | 84.00 (6.14) | 72.87 (7.06) | 9.49** |
| MMSE | 28.33 (1.66) | 28.94 (0.85) | 27.87 (2.29) | 28.13 (1.30) | 1.82 |
| HVLT |  |  |  |  |  |
| Trial 1 | 6.43 (2.00) | 6.06 (1.65) | 6.00 (2.17) | 7.27 (2.02) | 2.03 |
| Trial 2 | 8.63 (2.24) | 8.50 (1.90) | 7.80 (2.60) | 9.60 (1.96) | 2.63 |
| Trial 3 | 9.54 (2.33) | 9.75 (1.53) | 8.47 (3.16) | 10.40 (1.68) | 2.92 |
| Delay | 8.30 (2.82) | 8.56 (2.39) | 7.07 (3.49) | 9.27 (2.12) | 2.55 |
| Retention score | 82.05 (16.00) | 85.07 (16.23) | 75.43 (17.93) | 85.40 (12.66) | 1.85 |
| Discrimination Index | 10.35 (2.05) | 10.56 (1.46) | 9.73 (2.87) | 10.73 (1.53) | 1.03 |

Mean (Standard Deviation); **N* female (%); **p < .001

Table 2S.

Summary of photo-viewing conditions (Online only).

|  | Immersive Autographer | Desktop Autographer | Digital camera photographs |
| --- | --- | --- | --- |
| Type of photograph | Autographer - automatic | Autographer – automatic | Digital photographs taken by participant |
| Number of photographs  *M* (*SD*) | 203.19 (66.10) | 204.53 (47.34) | 19.40 (9.41) |
| Duration of photo-viewing task in minutes  *M* (*SD*) | 23.31 (5.81) | 24.27 (11.97) | 7.63 (10.94) |
| Type of screen | 160-degree cylindrical projection screen. 4.2m diameter, 2.9m height | Dell computer monitor | Dell computer monitor |
| Photograph order | Spatiotemporal. Deviates from chronological order when participant’s path looped on itself or when participant stayed in one position for several minutes. | Chronological | Chronological |
| Control of photograph presentation | Experimenter using gaming controller | Participant using forward and back arrow keys | Participant using forward and back arrow keys |
| Photograph presentation method | In place within virtual landscape.  Closer photographs appear larger.  Continuous with photographs growing larger on approach then disappearing to reveal those behind.  Sometimes viewed on an angle, horizontally flipped, or partially or wholly obscured.  One-by-one viewing possible for photographs in close proximity to allow viewing of photographs in clusters. | One-by-one in full-screen view | One-by-one in full-screen view |
| Number of photographs presented at one time | Multiple. Details of distant photographs not always visible. | One | One |
| Context presented | Virtual landscape.  Path taken by participant shown in coloured line. | None | None |

Table 3S.

Quantity and quality of details recalled in free recall by condition (Online only).

|  | Review 1 | | | |  | Review 2 | | | |  |  | |
| --- | --- | --- | --- | --- | --- | --- | --- | --- | --- | --- | --- | --- |
|  | Total | Immersive Autographer | Desktop Autographer | Digital camera photographs |  | Total | Immersive Autographer | Desktop Autographer | Digital camera photographs |  | *F*(1,42) | *p* |
| Total number | 92.36 (46.64) | 82.73 (36.27) | 80.33 (45.10) | 114.00 (52.26) |  | 104.11 (53.42) | 106.75 (40.46) | 102.13 (74.54) | 103.27 (43.00) |  |  |  |
| Type of detail |  |  |  |  |  |  |  |  |  |  |  |  |
| Activity | 22.31 (16.02) | 20.27 (11.09) | 16.47 (14.33) | 30.20 (19.24) |  | 25.20 (15.47) | 26.00 (11.48) | 22.33 (21.82) | 27.20 (11.76) |  |  |  |
| Place | 18.240 (8.70) | 20.53 (10.43) | 14.73 (7.79) | 19.93 (6.84) |  | 21.46 (8.55) | 23.00 (8.06) | 20.80 (10.74) | 20.47 (6.76) |  |  |  |
| People | 12.18 (10.78) | 8.53 (4.26) | 10.40 (8.04) | 17.60 (15.28) |  | 14.89 (10.00) | 13.81 (6.43) | 14.47 (11.85) | 16.47 (11.53) |  |  |  |
| Sensory-perceptive | 27.56 (16.75) | 24.33 (16.99) | 27.47 (18.46) | 30.87 (15.17) |  | 31.52 (20.66) | 33.63 (22.37) | 32.40 (23.86) | 28.40 (15.84) |  |  |  |
| Affect | 1.38 (1.81) | 0.87 (1.13) | 1.27 (1.22) | 2.00 (2.62) |  | 1.15 (1.21) | 1.13 (1.09) | 1.20 (1.37) | 1.13 (1.25) |  |  |  |
| Cognition | 7.18 (7.24) | 5.60 (8.19) | 6.67 (4.98) | 9.27 (8.08) |  | 5.78 (5.24) | 5.63 (6.20) | 6.00 (5.52) | 5.73 (4.10) |  |  |  |
| Time sign | 3.36 (2.11) | 2.60 (1.50) | 3.33 (2.35) | 4.13 (2.23) |  | 4.11 (4.41) | 3.56 (2.90) | 4.93 (6.77) | 3.87 (2.59) |  |  |  |
| Type of memory |  |  |  |  |  |  |  |  |  |  |  |  |
| Episodic | 77.76 (37.91) | 69.93 (26.60) | 66.80 (35.80) | 96.53 (44.24) |  | 86.74 (42.44) | 89.19 (35.27) | 82.80 (56.01) | 88.07 (35.96) |  |  |  |
| Semantic | 6.98 (7.76) | 6.20 (8.52) | 7.13 (8.66) | 7.60 (6.39) |  | 6.98 (7.30) | 5.75 (5.64) | 9.27 (10.40) | 6.00 (4.52) |  |  |  |
| Qualified | 7.62 (5.73) | 6.60 (5.45) | 6.40 (4.60) | 9.87 (6.66) |  | 10.39 (8.65) | 11.81 (9.36) | 10.07 (10.46) | 9.20 (5.77) |  |  |  |

Mean (Standard Deviation)

Table 4S.

Quantity and quality of details recalled in photo viewing recall by condition (Online only).

|  | Review 1 | | | |  | Review 2 | | | |
| --- | --- | --- | --- | --- | --- | --- | --- | --- | --- |
|  | Total | Immersive Autographer | Desktop Autographer | Digital camera photographs |  | Total | Immersive Autographer | Desktop Autographer | Digital camera photographs |
| Total number | 120.93 (65.03) | 130.38 (48.03) | 156.93 (79.02) | 74.87 (33.39) |  | 129.85 (87.29) | 130.38 (48.03) | 118.33 (80.32) | 70.40 (50.31) |
| Type of detail |  |  |  |  |  |  |  |  |  |
| Activity | 27.61 (20.67) | 31.63 (13.64) | 35.67 (28.22) | 15.27 (11.22) |  | 20.20 (13.71) | 24.56 (11.78) | 22.67 (16.10) | 13.07 (10.68) |
| Place | 23.52 (10.47) | 26.50 (11.35) | 28.13 (9.78) | 15.73 (4.54) |  | 24.35 (13.07) | 28.94 (12.27) | 26.87 (16.03) | 16.93 (6.42) |
| People | 17.07 (10.57) | 18.06 (8.40) | 24.00 (12.12) | 9.07 (3.95) |  | 13.17 (7.94) | 13.69 (6.38) | 15.80 (9.05) | 10.00 (7.66) |
| Sensory-perceptive | 38.96 (27.56) | 41.63 (23.79) | 52.87 (34.77) | 22.20 (10.45) |  | 37.54 (32.26) | 49.37 (34.63) | 41.27 (36.66) | 21.20 (5.94) |
| Affect | 1.89 (1.90) | 1.25 (1.44) | 2.13 (1.60) | 2.33 (2.47) |  | 1.02 (1.56) | 1.19 (1.97) | 1.07 (1.44) | 0.80 (1.21) |
| Cognition | 8.96 (7.29) | 8.75 (5.42) | 10.00 (8.98) | 8.13 (7.52) |  | 6.78 (8.58) | 7.00 (6.10) | 7.73 (7.77) | 5.60 (11.57) |
| Time sign | 3.04 (3.53) | 2.56 (1.82) | 4.47 (4.87) | 2.13 (3.09) |  | 2.93 (4.14) | 3.06 (3.51) | 2.93 (3.83) | 2.80 (5.21) |
| Type of memory |  |  |  |  |  |  |  |  |  |
| Episodic | 93.83 (50.06) | 100.25 (39.43) | 119.53 (60.89) | 61.27 (28.14) |  | 81.41 (50.98) | 98.44 (44.10) | 88.80 (60.24) | 56.07 (39.90) |
| Semantic | 7.54 (6.64) | 7.00 (4.97) | 11.33 (8.99) | 4.33 (2.74) |  | 5.65 (4.60) | 7.13 (5.51) | 4.67 (2.77) | 5.07 (4.89) |
| Qualified | 19.57 (15.20) | 23.13 (11.75) | 26.07 (19.84) | 9.27 (5.24) |  | 18.93 (18.99) | 23.44 (18.07) | 24.87 (24.20) | 9.27 (8.46) |
| Origin of detail |  |  |  |  |  |  |  |  |  |
| New | 60.62 (34.46) | 59.00 (27.38) | 88.64 (37.29) | 36.20 (14.53) |  | 45.80 (.4.34) | 62.37 (29.40) | 76.40 (50.50) | 38.40 (22.33) |
| Old | 60.24 (42.08) | 71.38 (31.50) | 69.93 (56.71) | 38.67 (25.93) |  | 60.26 (42.08) | 65.63 (41.20) | 41.93 (36.66) | 32.00 (31.41) |

Mean (Standard Deviation)
