# Supplementary material
Source: publisher figshare collection journal article supplement (https://karger.figshare.com/articles/dataset/_/12039864)
Supplement: Supplementary file 1 [file 1 › 505848_sm2.pdf]

**Figures for online**

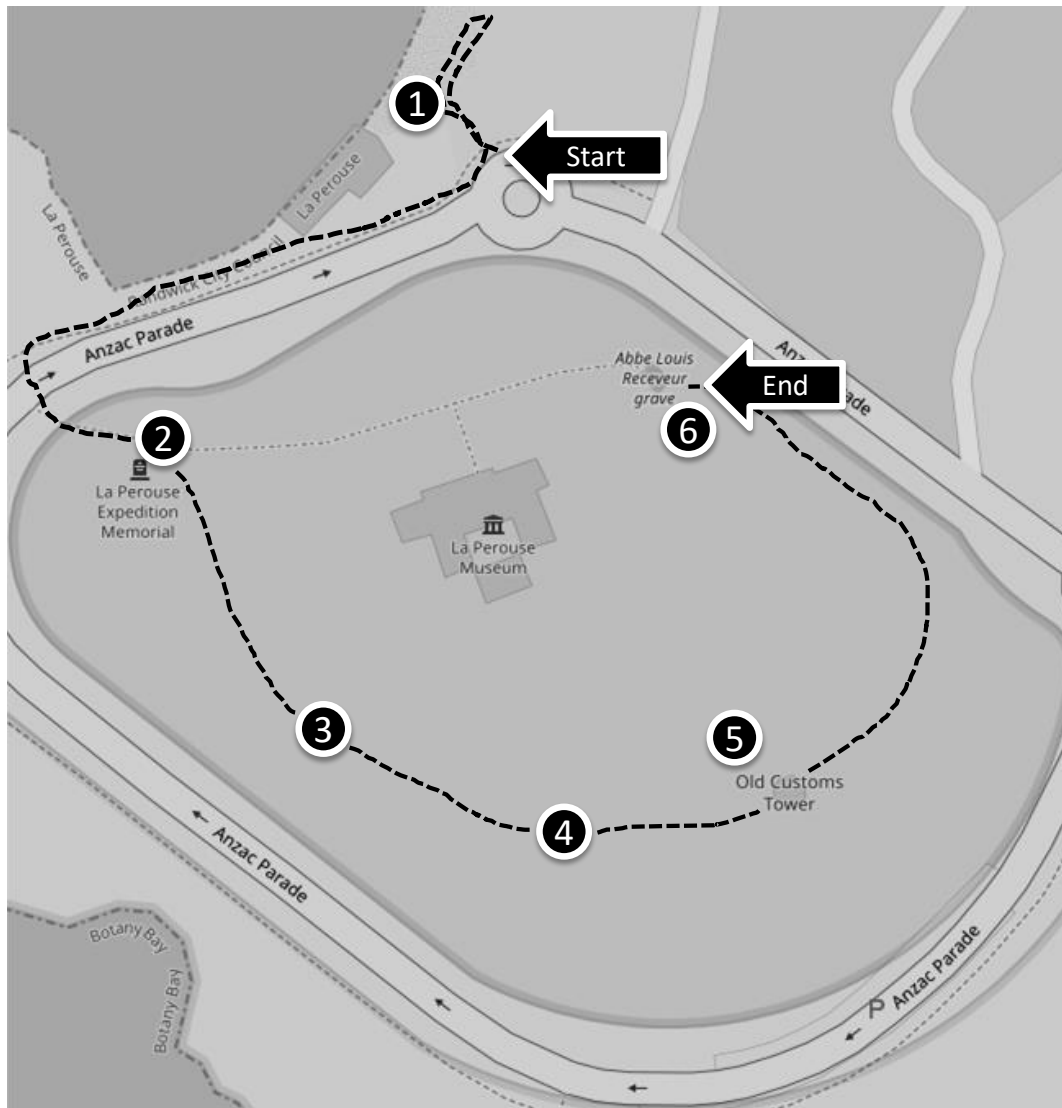

- ① Walk along beach
- ② Visit to La Perouse monument
- ③ Viewing rock formation
- ④ Morning tea break
- ⑤ Visit to Barrack Tower
- ⑥ Visit to Receveur Grave

© OpenStreetMap contributors [openstreetmap.org](https://openstreetmap.org)

Figure 1S. Map showing the approximate route taken during the initial site visit, showing the approximate location of the six events that occurred on each visit. (Online only)

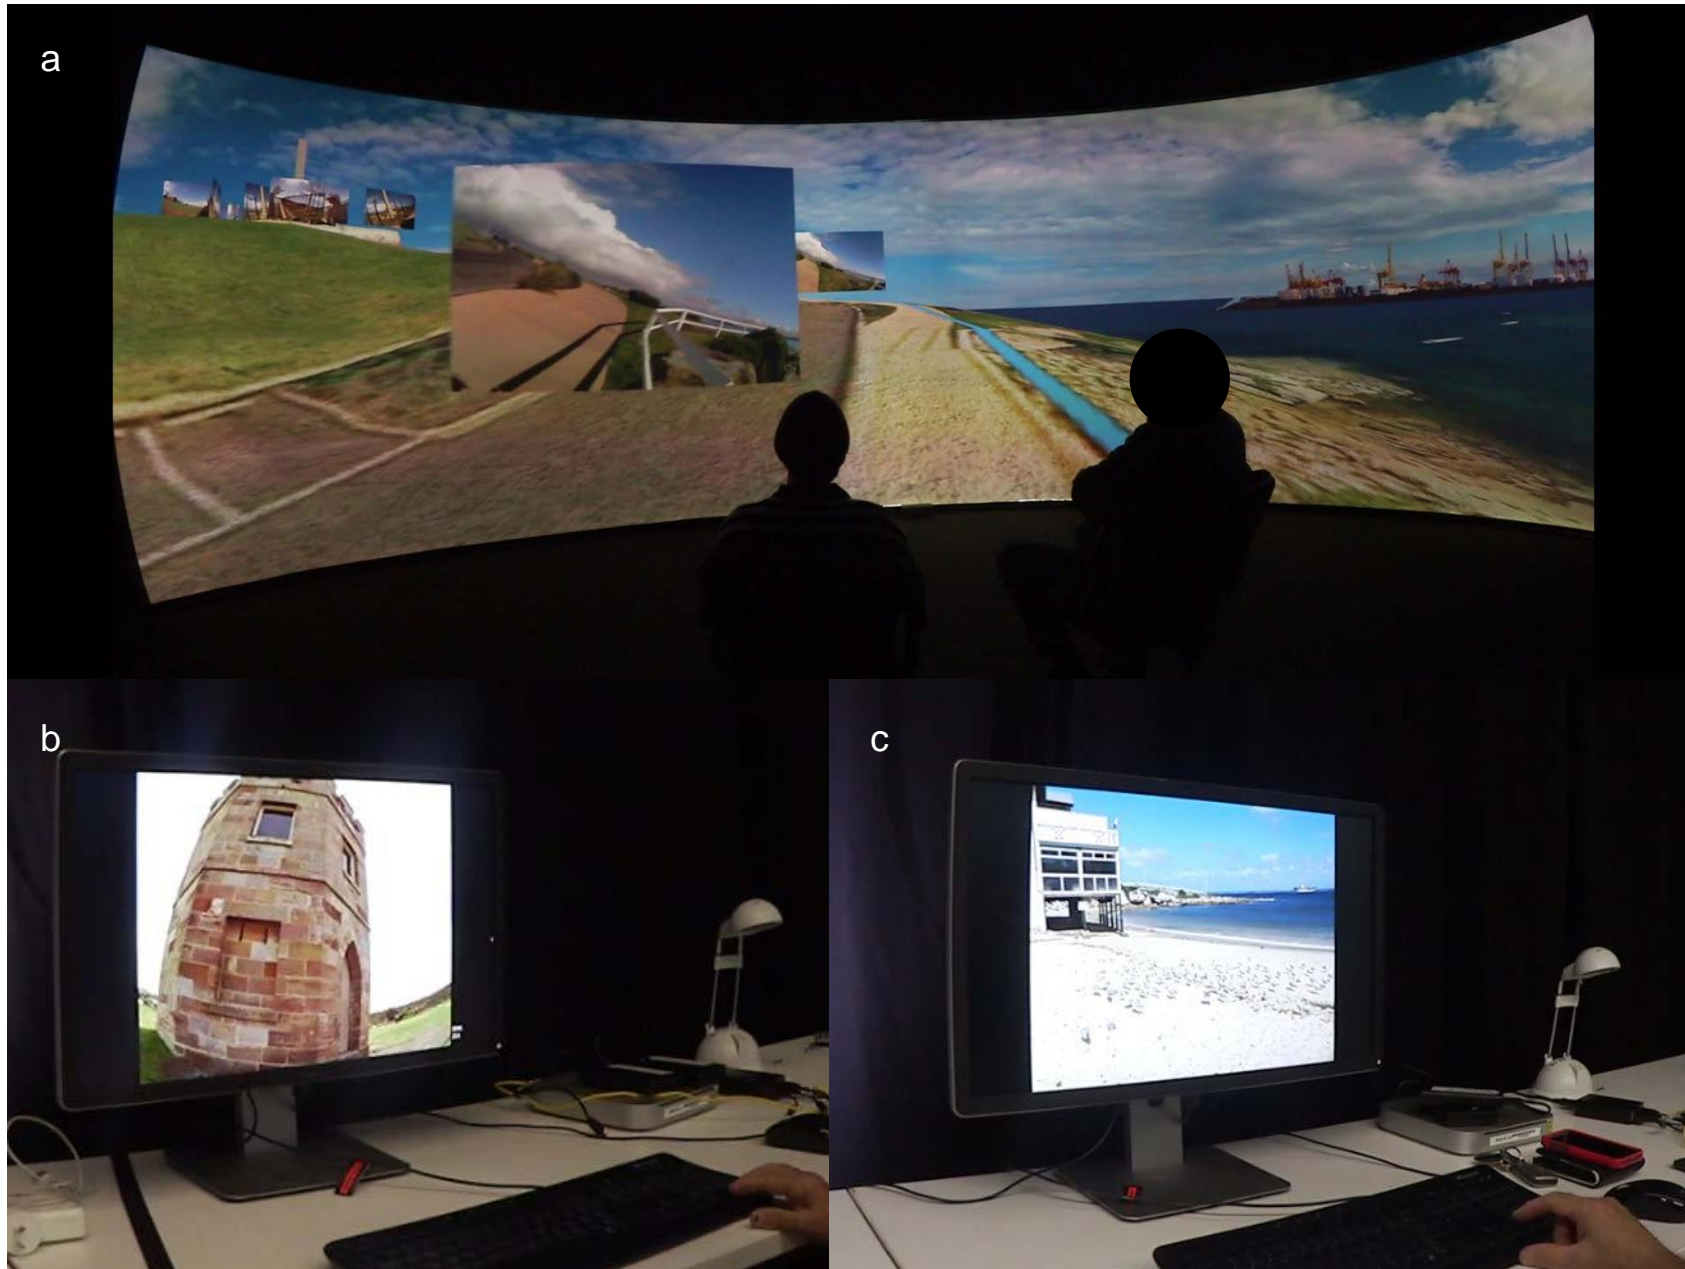

Figure 2S. The three photo viewing recall conditions: a = immersive SenseCam; b = SenseCam desktop; c = digital camera photographs. Participant's face obscured to protect anonymity (Online only).
